# Supplementary material for: Systematic review of quantitative imaging biomarkers for neck and shoulder musculoskeletal disorders
Source: PubMed Central journal article supplement (PMC5596923; doi:10.1186/s12891-017-1694-y), 2017-09-12
Supplement: 12891_2017_1694_MOESM1_ESM.pdf [file 12891_2017_1694_MOESM1_ESM.pdf]

| <b>Additional file 1.</b> Search terms for musculoskeletal disorders (MSDs) and imaging markers. |            |                                                                                                                                                                                                                                                                                                                                            |
|--------------------------------------------------------------------------------------------------|------------|--------------------------------------------------------------------------------------------------------------------------------------------------------------------------------------------------------------------------------------------------------------------------------------------------------------------------------------------|
| MSD                                                                                              |            |                                                                                                                                                                                                                                                                                                                                            |
|                                                                                                  | MESH terms | Upper extremity/pathology, upper extremity/physiopathology, rotator cuff, neck muscles, musculoskeletal pain, thoracic outlet syndrome, shoulder impingement syndrome, shoulder pain, cumulative trauma disorders, neck pain, musculoskeletal diseases tendinopathy, myofascial pain syndromes                                             |
|                                                                                                  | Keywords   | Rotator cuff , musculoskeletal pain, thoracic outlet syndrome, shoulder impingement syndrome, frozen shoulder, adhesive capsulitis, shoulder pain, musculoskeletal disorder, MSD, muscle pain, neck pain, trapezius myalgia, neck-shoulder pain, musculoskeletal diseases, tendinopathy, tendonitis, tendinitis, tendinosis, tenosynovitis |
| Imaging marker                                                                                   |            |                                                                                                                                                                                                                                                                                                                                            |
|                                                                                                  | MESH terms | Biological markers, Diagnostic Imaging/methods, Laser-Doppler Flowmetry, Hemodynamics, skin temperature, Blood Circulation, Microcirculation, Regional Blood Flow, Galvanic Skin Response, Tendons/ultrasonography, Muscles/ultrasonography, Brachial                                                                                      |

|  |          |                                                                                                                                                                                                                                                                                                                                              |
|--|----------|----------------------------------------------------------------------------------------------------------------------------------------------------------------------------------------------------------------------------------------------------------------------------------------------------------------------------------------------|
|  |          | Plexus/ultrasonography,<br>Neck/ultrasonography,<br>Upper<br>Extremity/ultrasonography                                                                                                                                                                                                                                                       |
|  | Keywords | Biological marker,<br>biomarker, diffusion tensor<br>imaging, near infrared<br>spectroscopy,<br>thermography, CT scan,<br>PET scan, Positron<br>emission tomography,<br>functional magnetic<br>resonance imaging, laser<br>Doppler flowmetry,<br>plethysmography, skin<br>temperature, blood<br>circulation, blood flow,<br>microcirculation |

*Note: the search was restricted to include peer-reviewed articles between June 4, 1988 and October 14, 2016, English language, humans, and adults. Terms within each broad category (MSD, quantitative imaging marker) are combined with OR and between categories with AND.*
