# Supplementary material for: Systematic review of quantitative imaging biomarkers for neck and shoulder musculoskeletal disorders
Source: PubMed Central journal article supplement (PMC5596923; doi:10.1186/s12891-017-1694-y), 2017-09-12
Supplement: 12891_2017_1694_MOESM2_ESM.pdf [file 12891_2017_1694_MOESM2_ESM.pdf]

|                                                                                                            |
|------------------------------------------------------------------------------------------------------------|
| <b>Additional file 2.</b> Questions used in the primary screen for exclusion of articles.                  |
| Exclusion questions                                                                                        |
| Case study?                                                                                                |
| Gray literature?                                                                                           |
| Review article?                                                                                            |
| Cadaver study?                                                                                             |
| Lower extremity MSD?                                                                                       |
| Widespread pain?                                                                                           |
| Traumatic onset?                                                                                           |
| Participants with known disc problems?                                                                     |
| Conventional X-ray study?                                                                                  |
| Experiment which induce pain in healthy subjects or those with MSDs by injecting substances into the body? |

*Notes: An answer “yes” to one or more questions led to exclusion. Two independent reviewers had to agree on these items in order to exclude a study.*
