# Supplementary material for: Systematic review of quantitative imaging biomarkers for neck and shoulder musculoskeletal disorders
Source: PubMed Central journal article supplement (PMC5596923; doi:10.1186/s12891-017-1694-y), 2017-09-12
Supplement: 12891_2017_1694_MOESM3_ESM.pdf [file 12891_2017_1694_MOESM3_ESM.pdf]

| <b>Additional file 3.</b> Questions used in the secondary screen for quality assessment. |                                                                                                                                                              |
|------------------------------------------------------------------------------------------|--------------------------------------------------------------------------------------------------------------------------------------------------------------|
| 1.                                                                                       | Was the hypothesis/aim/objective clearly stated?                                                                                                             |
| 2.                                                                                       | Was the biomarker described in sufficient detail to permit its replication?                                                                                  |
| 3.                                                                                       | Was the MSD definition or diagnostic criteria clearly described?                                                                                             |
| 4.                                                                                       | Was the MSD symptom severity clearly described?                                                                                                              |
| 5.                                                                                       | Was there a comparison group?                                                                                                                                |
| 6.                                                                                       | Were the selection criteria (inclusion/exclusion) clearly described?                                                                                         |
| 7.                                                                                       | Was the participation/response rate to the initial invitation 65% or greater?                                                                                |
| 8.                                                                                       | Was loss to follow up less than 35%?                                                                                                                         |
| 9.                                                                                       | Was an attempt made to blind those analyzing the biomarker to case condition?                                                                                |
| 10.                                                                                      | Was the time period between assessment of case condition and biomarker assessment short enough to be reasonably sure that the case condition did not change? |
| 11.                                                                                      | Was there any control for confounding either through restriction of subjects or through adjustment in the analysis?                                          |
| 12.                                                                                      | Was the distribution of principal confounders in each group of subjects clearly described?                                                                   |
| 13.                                                                                      | Was there a power analysis to find an adequate sample size?                                                                                                  |
| 14.                                                                                      | Were the statistical models used to assess the main outcomes adequately described?                                                                           |
| 15.                                                                                      | Was the statistical analysis appropriate?                                                                                                                    |
| 16.                                                                                      | Were estimates of the random variability in the main effect reported?                                                                                        |
| 17.                                                                                      | Were the main findings clearly described?                                                                                                                    |

*Note: Possible responses were “yes”, “unknown/not applicable” or “no”.*
